# Supplementary material for: Biogeophysical and biogeochemical impacts of land-use change simulated by MIROC-ES2L
Source: Springer Nature journal article supplement (doi:10.1186/s40645-020-00372-w), 2020-09-23
Supplement: 40645_2020_372_MOESM1_ESM.pdf [file 40645_2020_372_MOESM1_ESM.pdf]

## Supplementary materials

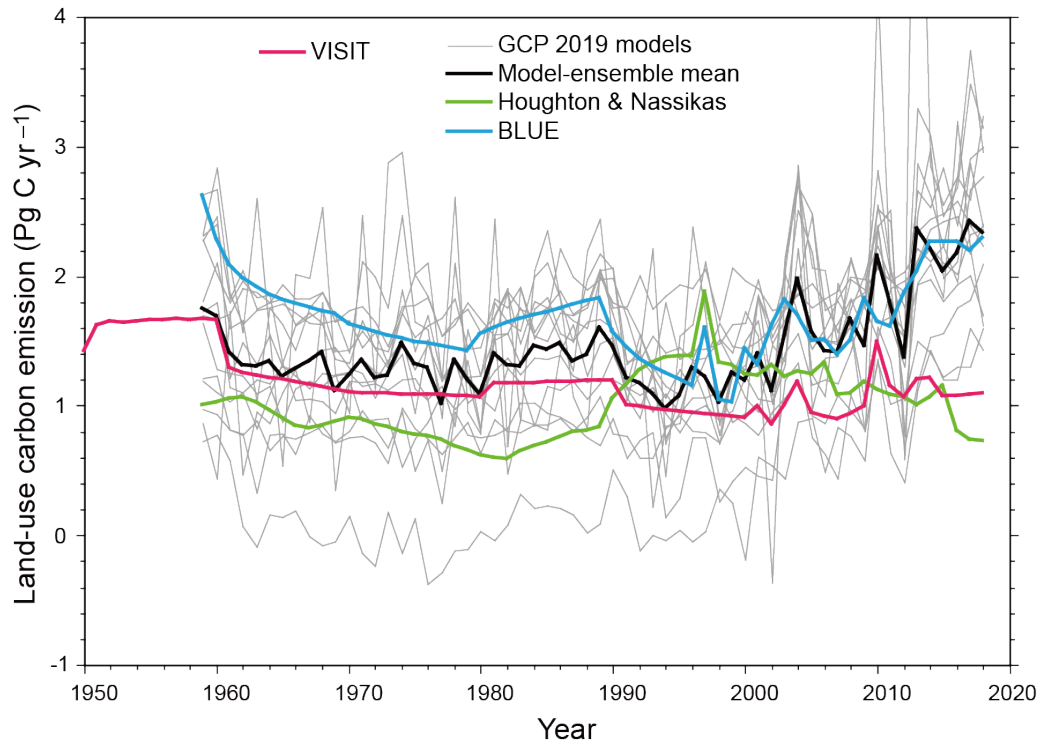

**Fig. S1** Comparison of land-use change emissions between VISIT estimation and others used in the global CO<sub>2</sub> budget analysis (Friedlingstein et al. 2019). For keeping consistency with other model estimates, VISIT (offline version) was driven by historical climate data at spatial resolution of 0.5° × 0.5°
