# Supplementary material for: Biogeophysical and biogeochemical impacts of land-use change simulated by MIROC-ES2L
Source: Springer Nature journal article supplement (doi:10.1186/s40645-020-00372-w), 2020-09-23
Supplement: 40645_2020_372_MOESM2_ESM.pdf [file 40645_2020_372_MOESM2_ESM.pdf]

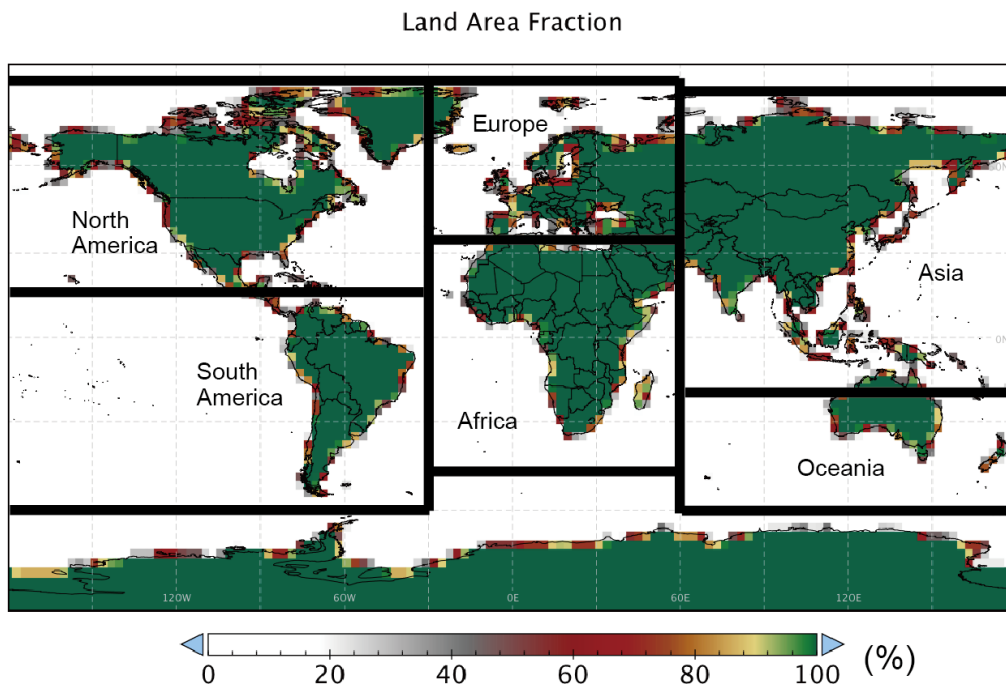

**Fig. S2** Regional boundaries used in this study overlaid on the MIROC-ES2L land fraction map: Asia (856 land grids,  $41.7 \times 10^6$  km<sup>2</sup>), Africa (462 land grids,  $35.9 \times 10^6$  km<sup>2</sup>), Oceania (112 land grids,  $7.0 \times 10^6$  km<sup>2</sup>), Europe (347 land grids,  $13.6 \times 10^6$  km<sup>2</sup>), North America (653 land grids,  $25.2 \times 10^6$  km<sup>2</sup>), and South America (271 land grids,  $18.7 \times 10^6$  km<sup>2</sup>)
