# Supplementary material for: Biogeophysical and biogeochemical impacts of land-use change simulated by MIROC-ES2L
Source: Springer Nature journal article supplement (doi:10.1186/s40645-020-00372-w), 2020-09-23
Supplement: 40645_2020_372_MOESM3_ESM.pdf [file 40645_2020_372_MOESM3_ESM.pdf]

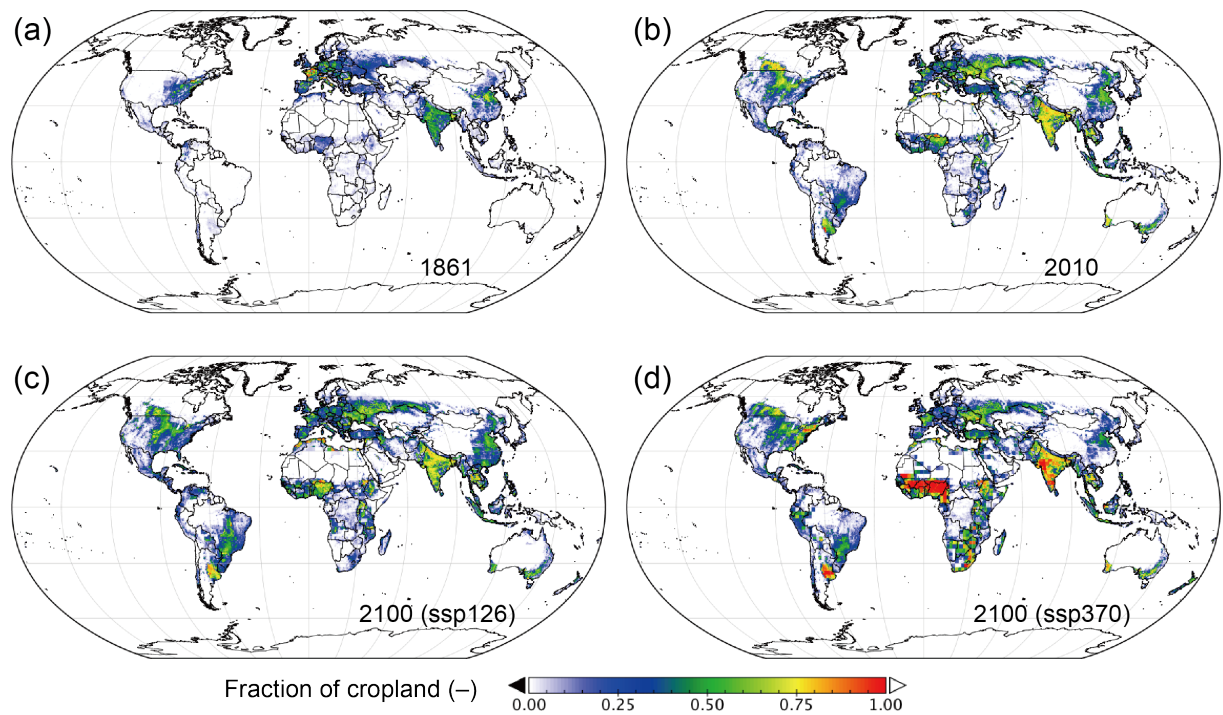

**Fig. S3** Changes in the cropland fraction in (a) 1861, (b) 2010, (c) 2100 by ssp126, and (d) 2100 by ssp370. Data were derived by using Land Use Harmonization version 2
