# Supplementary material for: Biogeophysical and biogeochemical impacts of land-use change simulated by MIROC-ES2L
Source: Springer Nature journal article supplement (doi:10.1186/s40645-020-00372-w), 2020-09-23
Supplement: 40645_2020_372_MOESM4_ESM.pdf [file 40645_2020_372_MOESM4_ESM.pdf]

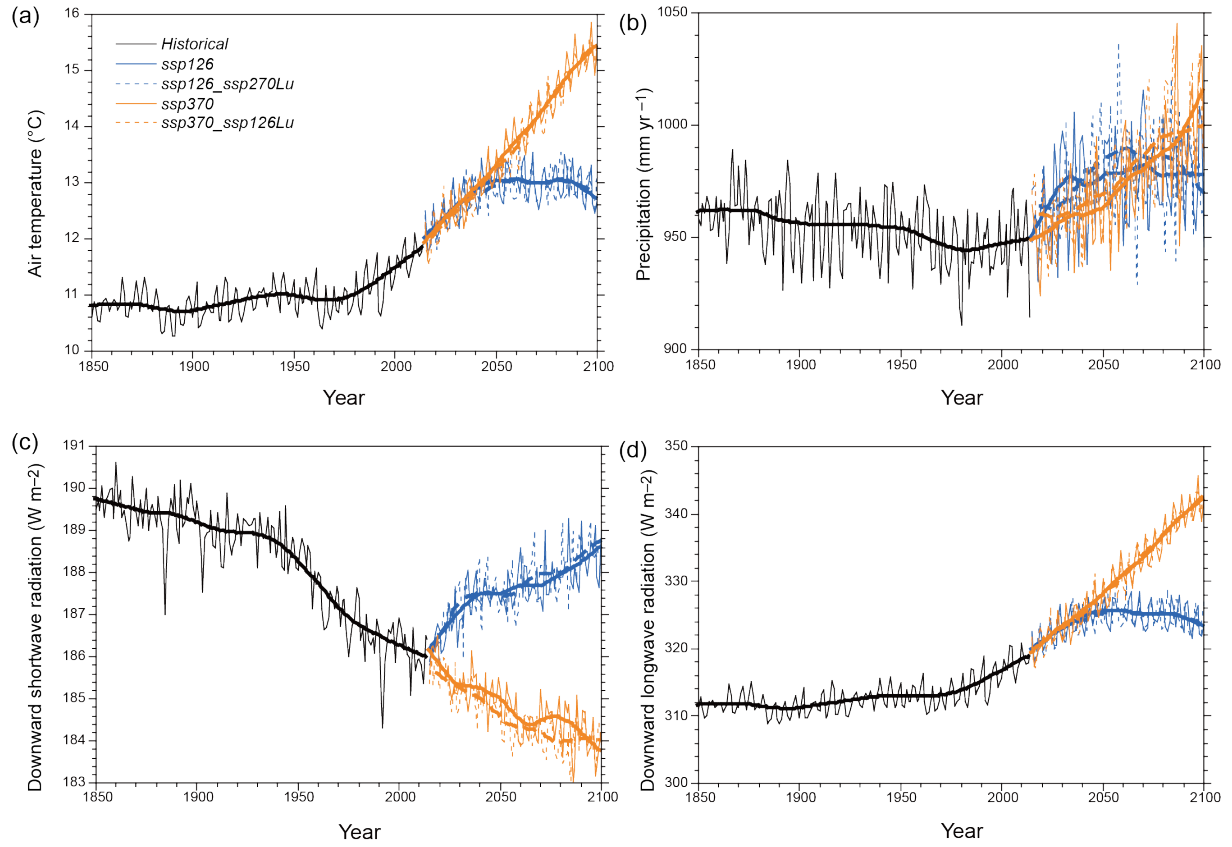

**Fig. S4** Temporal changes in global terrestrial-means of (a) annual near-surface air temperature, (b) mean annual precipitation, (c) downward shortwave radiation, and (d) downward longwave radiation
