# Supplementary material for: Biogeophysical and biogeochemical impacts of land-use change simulated by MIROC-ES2L
Source: Springer Nature journal article supplement (doi:10.1186/s40645-020-00372-w), 2020-09-23
Supplement: 40645_2020_372_MOESM5_ESM.pdf [file 40645_2020_372_MOESM5_ESM.pdf]

2020-06-19

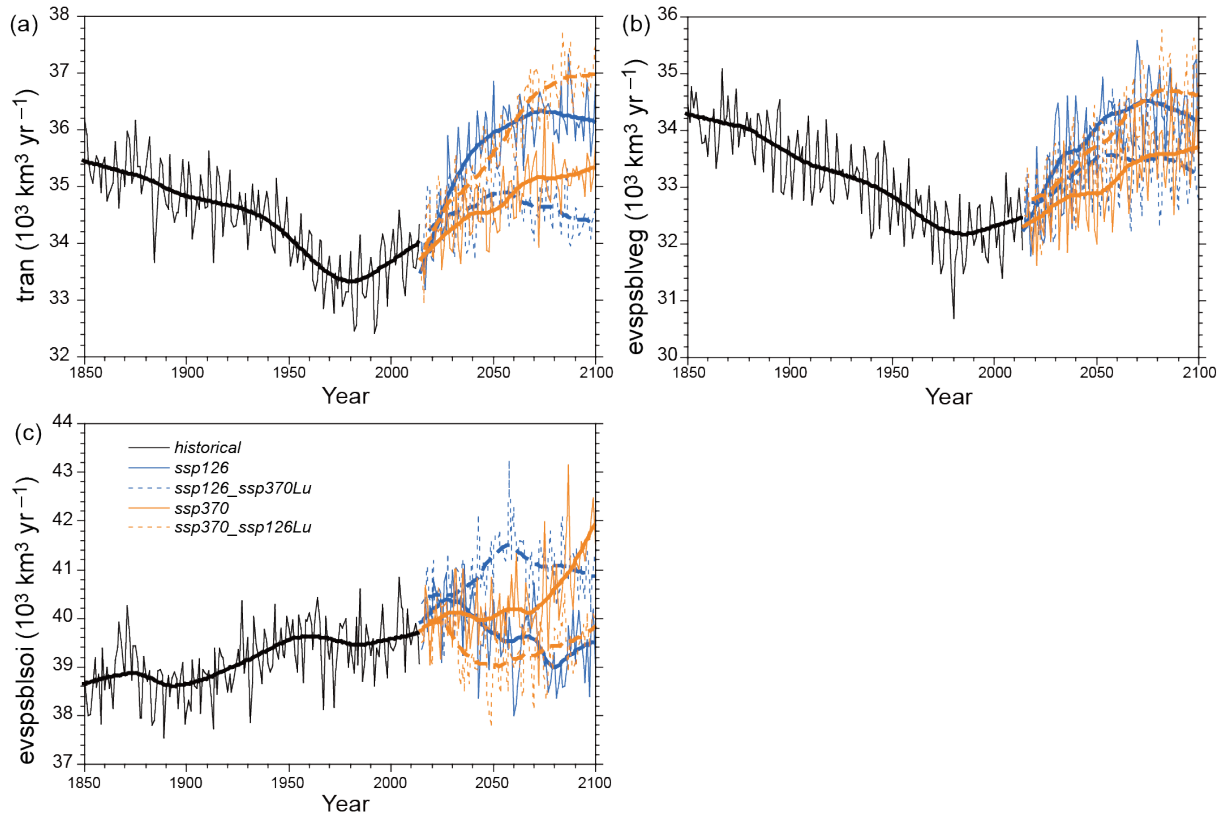

**Fig. S5** Temporal changes in global water flows. (a) Vegetation transpiration (tran), (b) evaporation from canopy-intercepted precipitation (evspsblveg), and (c) evaporation from soil (evspsblsoi)
